# Supplementary material for: Bioactive Properties of Kakadu Plum-Blended Products
Source: MDPI journal article supplement (doi:10.3390/molecules28062828), 2023-03-21
Supplement: s1 [file s1]

**Supplementary Table S1.** Inhibitory effect of Kakadu plum powder and its blend products against several pathogenic microorganisms.

| Microorganisms                             | Zones of inhibition (mm) |                |                  |                |              |                |                  |               |           |                      |
|--------------------------------------------|--------------------------|----------------|------------------|----------------|--------------|----------------|------------------|---------------|-----------|----------------------|
|                                            | Kakadu plum 1            | Kakadu plum 2  | Kakadu plum hemp | Collagen blend | Energy blend | Immunity blend | Gut health blend | Kakadu plum 8 | Blueberry | Streptomycin sulfate |
| <i>S. aureus</i>                           | 20.5±0.4<br>a            | 20.7±0.6<br>a  | 18.2±0.4 b       | -              | -            | 10.9±0.1 c     | 8.9±0.5 d        | 20.0±0.4<br>a | -         | 15.8±0.03 e          |
| <i>MRSA</i>                                | 6.5±0.2 a                | 6.9±0.5<br>ab  | -                | -              | -            | -              | -                | 6.0±0.2 a     | -         | 9.02±0.1 c           |
| <i>B. cereus</i>                           | 12.5±0.4<br>a            | 13.1±0.2<br>a  | 7.0±0.2 b        | 4.1±0.2 cd     | -            | 4.6±0.3 c      | 3.3±0.1 d        | 13.0±0.6<br>a | 1.7±0.3 e | 17.71±0.4 f          |
| <i>E. coli</i>                             | -                        | -              | -                | -              | -            | -              | -                | -             | -         | 13.48±0.3 a          |
| <i>S. putrefaciens</i>                     | -                        | -              | -                | -              | -            | -              | -                | -             | -         | 17.33±0.1 a          |
| <i>P. aeruginosa</i><br>(clinical isolate) | 4.9±0.5 a                | 6.6±0.5 b      | 2.7±0.5 c        | -              | -            | -              | -                | 6.2±0.1 b     | -         | 12.77±0.4 d          |
| <i>P. aeruginosa</i>                       | 6.8±0.2 a                | 5.9±0.3<br>abc | -                | -              | -            | -              | -                | 5.5±0.1<br>bc | -         | 4.79±0.8 c           |
| <i>C. albicans</i>                         | -                        | -              | -                | -              | -            | -              | -                | -             | -         | -                    |
| <i>A. flavus</i>                           | -                        | -              | -                | -              | -            | -              | -                | -             | -         | -                    |

Data are mean ± standard deviation (n=3); data with different letters in the same row are significantly different ( $p \leq 0.05$ ). The absence of inhibitory activity is shown by (-).  
MRSA, methicillin-resistant *Staphylococcus aureus*.

**Supplementary Table S2.** Data of total vitamin C content, total phenolic content, total ellagic acid content and DPPH scavenging capacity.

|                                | Total Vitamin C content<br>(mg/100g DW) | Total phenolic content (mg<br>GAE/g DW) | Total ellagic acid content<br>(mg/100g DW) | DPPH (μmole TE/g<br>DW) |
|--------------------------------|-----------------------------------------|-----------------------------------------|--------------------------------------------|-------------------------|
| Kakadu Plum                    | 15839.51±248.14 c                       | 30.00±1.03 b                            | 2870±134.48 a                              | 1306.2±21.23 b          |
| Kakadu Plum                    | 18125.85±493.88 a                       | 30.24±0.69 a                            | 2823±67.63 a                               | 1390.54±12.24 a         |
| Kakadu Plum Hemp               | 1727.61±50.65 d                         | 24.62±0.45 d                            | 279±3.75 b                                 | 199.998±6.17 c          |
| Collagen blend                 | 1446.65±82.25 de                        | 242.54±6.12 d                           | 209±7.74 b                                 | 163.587±3.91 cd         |
| Energy blend                   | 1467.79±22.57 de                        | 258.36±8.27 e                           | 177±18.07 b                                | 139.663±2.89 de         |
| Kaiyu Superfoods<br>Immunity   | 1436.87±81.06 de                        | 209.22±3.32 de                          | 241±14.02 b                                | 99.6386±2.67 de         |
| Kaiyu Superfoods Gut<br>health | 959.03±33.20 e                          | 28.25±0.49 f                            | 173±16.16 b                                | 121.387±0.44 cde        |
| Kakadu Plum                    | 16619.4±320.85 b                        | 18.65±0.39 c                            | 2872±106.86 a                              | 1408.99±37.81 a         |
| Blueberry                      | 36.89±1.10 f                            | 19.30±0.26 f                            |                                            | 104.116±1.05 e          |

Data are mean ± standard deviation (n=3); data with different letters in the same column are significantly different ( $p \leq 0.05$ ).

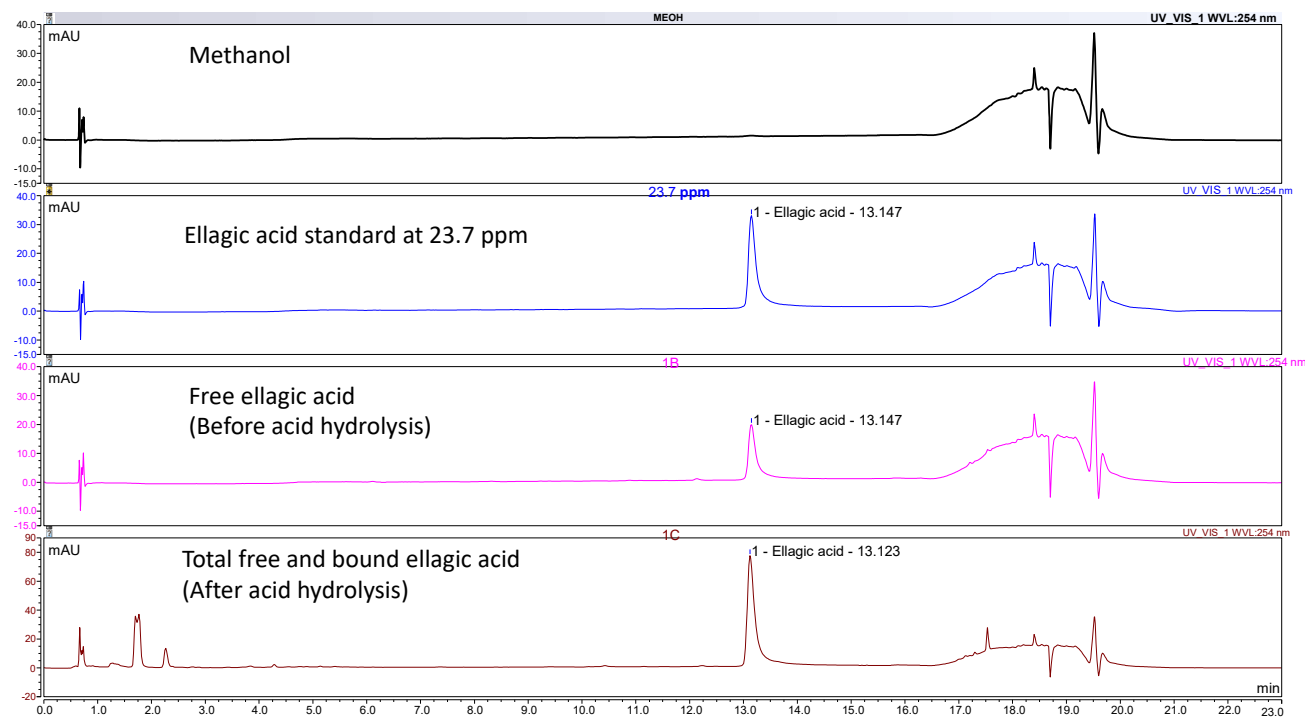

**Supplementary Figure S1.** Representative HPLC-PDA chromatograms at 254 nm of the extracts before and after acid hydrolysis, ellagic acid standard, and methanol as a blank.

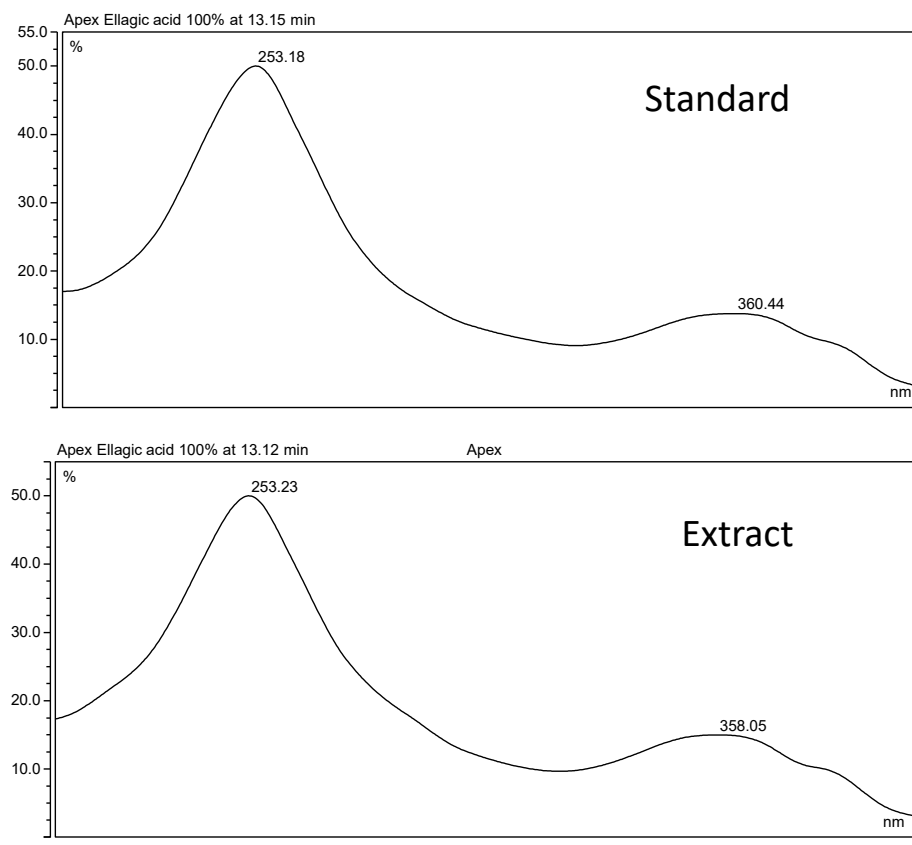

**Supplementary Figure S2.** The UV spectra scanned from 200 nm to 400 nm of the standard (top) and the analyte (bottom).
